# Supplementary material for: Metagenomic Analysis of Respiratory RNA Virome of Children with and without Severe Acute Respiratory Infection from the Free State, South Africa during COVID-19 Pandemic Reveals Higher Diversity and Abundance in Summer Compared with Winter Period
Source: MDPI journal article supplement (doi:10.3390/v14112516), 2022-11-14
Supplement: s1 [file s1]

**Table S1.** Pooling criteria for the SARI and Non-SARI samples in winter and summer.

|                                    |                                                                                               |
|------------------------------------|-----------------------------------------------------------------------------------------------|
| <b>Summer samples with SARI</b>    |                                                                                               |
| <b>Pool Number</b>                 | <b>Timelines during which samples were collected</b>                                          |
| n=3 (A1)                           | Before the detection of first COVID-19 case in the country (Between January to February 2020) |
| n=8 (B1)                           | Between COVID lock-down declaration through first wave (End of March 2020 -November 2020)     |
| n=23 (C1)                          | During second wave of COVID-19. (December 2020–February 2021)                                 |
| n=55 (D1)                          | Between second and third waves (February 2021–April 2021)                                     |
| n=16 (E1)                          | Early third wave of COVID-19 (May 2021)                                                       |
| <b>Summer samples without SARI</b> |                                                                                               |
| <b>Pool Number</b>                 | <b>Timeline during which samples were collected</b>                                           |
| n=6 (A2)                           | Between COVID-19 lockdown declaration through first wave (End of March 2020 -November 2020)   |
| n=16 (B2)                          | During second wave of COVID-19 (December 2020–February 2021)                                  |
| n=38 (C2)                          | Between second and third waves of COVID-19 (February 2021–April 2021)                         |
| n=20 (D2)                          | Early third wave of COVID-19 May 2021                                                         |
| <b>Winter sample with SARI</b>     |                                                                                               |
| <b>Pool Number</b>                 | <b>Timeline during which samples were collected</b>                                           |
| n=15 (E1)                          | May/June                                                                                      |
| n=14 (F1)                          | July                                                                                          |
| n=15 (G1)                          | July/August                                                                                   |
| <b>Winter sample without SARI</b>  |                                                                                               |
| <b>Pool Number</b>                 | <b>Timelines during which samples were collected</b>                                          |
| n=20 (E2)                          | May/June                                                                                      |
| n=20 (F2)                          | July                                                                                          |
| n=19 (G2)                          | July/August                                                                                   |

**Table S2.** Characteristics of Genome detective analysis tool.

|                                                        |                                                                  |
|--------------------------------------------------------|------------------------------------------------------------------|
| Classification tool                                    | Genome detective v 2.40                                          |
| Usage                                                  | Patient care                                                     |
| In-house/ commercially available                       | Commercial                                                       |
| Local/web-based                                        | Web based                                                        |
| De novo assembly                                       | Yes                                                              |
| Alignment of NT/ AA                                    | NT/AA                                                            |
| Database used by participant viral/bacterial (version) | Viruses; based on RefSeq (filtering: Swissprot Uniref 90) v2018- |
| Paired reads as input option                           | Yes                                                              |
| Trimming and QC tools                                  | Trimmomatic and FastQC                                           |
| Exclusion of human reads                               | Yes                                                              |
| Output type                                            | Web interface, interactive, and Excel                            |
| Visualization of genome coverage                       | Yes                                                              |
| Computational time for analysis per sample (CPU/RAM)   | -10 nm (web-based)                                               |
| Cut-off for defining positive result used              | ≥3 regions, distributed                                          |
| Confirmatory analysis required for clinical reporting  | Undisclosed                                                      |
| Adapted study specific cut off for defining detection. | ≥1 read                                                          |

**Table S3.** Demographic and clinical data of children in the SARI and Non-SARI group recruited for the study.

|                                          | <b>SARI (n=149)</b> | <b>Non-SARI (n=139)</b> |
|------------------------------------------|---------------------|-------------------------|
| <b>Season</b>                            |                     |                         |
| Summer                                   | 105                 | 80                      |
| Winter                                   | 44                  | 59                      |
| <b>Sex n (%)</b>                         |                     |                         |
| Male                                     | 93 (62.4%)          | 82 (59.0%)              |
| Female                                   | 56 (37.6%)          | 57 (41.0%)              |
| <b>Age</b>                               |                     |                         |
| Median in months                         | 14.5                | 19                      |
| <b>SARI clinical details n (%)</b>       |                     |                         |
| Cough                                    | 149 (100%)          | N/A                     |
| Measured fever $\geq 38^{\circ}\text{C}$ | 149 (100%)          | N/A                     |
| Need for oxygen                          | 66 (44.2%)          | N/A                     |
| Feeding difficulty                       | 23 (15.4%)          | N/A                     |
| Chest indrawing                          | 54 (36.2%)          | N/A                     |
| Hospitalization                          | 149 (100%)          | N/A                     |
| <b>SARI suspected diagnoses n (%)</b>    |                     |                         |
| <b>Bronchiolitis</b>                     | 33                  | N/A                     |
| <b>Pneumonia</b>                         | 52                  | N/A                     |
| <b>bronchopneumonia</b>                  | 24                  | N/A                     |
| <b>Unspecified</b>                       | 30                  | N/A                     |
| <b>Epiglottitis</b>                      | 1                   | N/A                     |
| <b>Asthma and pneumonia</b>              | 5                   | N/A                     |
| <b>Viral meningitis</b>                  | 1                   | N/A                     |
| <b>Jeune dystrophy syndrome</b>          | 1                   | N/A                     |
| <b>Croup grade 3</b>                     | 2                   | N/A                     |
| <b>Other SARI parameters n (%)</b>       |                     |                         |
| Asthmatic                                | 5 (3.3%)            | N/A                     |
| HIV infected                             | 27 (18.1%)          | N/A                     |
| ICU admission                            | 0 (0%)              | N/A                     |
| Household member smokes                  | 12 (8.0%)           | N/A                     |
| Attends creche                           | 19 (12.7%)          | N/A                     |
| <b>Non-SARI clinical details n (%)</b>   |                     |                         |
| Convulsion and seizure                   | N/A                 | 9 (6.4%)                |
| Gastroenteritis                          | N/A                 | 19 (13.6%)              |
| Acute malnutrition                       | N/A                 | 22 (15.7%)              |
| Fever                                    | N/A                 | 5 (3.5%)                |

|                                        |     |           |
|----------------------------------------|-----|-----------|
| Epilepsy                               | N/A | 3 (2.14%) |
| Heart problem                          | N/A | 2 (1.4%)  |
| Meningitis                             | N/A | 3 (2.14%) |
| Dog bite                               | N/A | 2 (1.4%)  |
| Paraffin ingestion                     | N/A | 4 (2.8%)  |
| Neurological problem                   | N/A | 1 (0.71%) |
| Nephrotic syndrome                     | N/A | 1 (0.71%) |
| Abscess                                | N/A | 3 (2.14%) |
| Rash                                   | N/A | 1 (0.71%) |
| Gastroenteritis and malnutrition       | N/A | 2 (1.4%)  |
| Eczema                                 | N/A | 4 (2.8%)  |
| Hoarseness of the voice                | N/A | 1 (0.71%) |
| Injury                                 | N/A | 14 (10%)  |
| Skin infection                         | N/A | 3 (2.14%) |
| Diarrhoea and vomiting                 | N/A | 2 (1.4%)  |
| Fractured bone                         | N/A | 2 (1.4%)  |
| Anaemia                                | N/A | 2 (1.4%)  |
| Burns                                  | N/A | 7 (5%)    |
| Ear infection                          | N/A | 2 (1.4%)  |
| Vomiting                               | N/A | 2 (1.4%)  |
| Dehydration                            | N/A | 2 (1.4%)  |
| Neonatal encephalopathy                | N/A | 1 (0.71%) |
| Dental problem                         | N/A | 5 (3.5%)  |
| Coin ingestion                         | N/A | 2 (1.43%) |
| Smoke inhalation                       | N/A | 1 (0.71%) |
| Diarrhoea                              | N/A | 2 (1.4%)  |
| Epistaxis                              | N/A | 3 (2.14%) |
| Swollen knee                           | N/A | 1 (0.71%) |
| Electrical shock                       | N/A | 1 (0.71%) |
| Eye pain                               | N/A | 2 (1.43%) |
| Jaundice                               | N/A | 1 (0.71%) |
| Cellulitis                             | N/A | 1 (0.71%) |
| Swollen neck                           | N/A | 1 (0.71%) |
| <b>Other Non-SARI parameters n (%)</b> |     |           |
| Household member smokes                | N/A | 14(10%)   |
| Attends creche                         | N/A | 11(7.8%)  |
| HIV infected                           | N/A | 12 (8.5%) |

**Table S4.** Detected bacteriophages across all sample pools in both seasons.

| Detected bacteriophages in both SARI and non-SARI pools across both seasons | Total number of reads |
|-----------------------------------------------------------------------------|-----------------------|
| Escherichia phage                                                           | 644                   |
| Enterobacteria phage                                                        | 961                   |
| Streptococcus phage                                                         | 832                   |
| Klebsiella phage                                                            | 468                   |
| Staphylococcus phage                                                        | 1113                  |
| Stx2-converting phage                                                       | 838                   |
| Lactococcus phage                                                           | 896                   |
| Vibrio phage                                                                | 139                   |
| Salmonella phage                                                            | 655                   |
| Proteus phage                                                               | 937                   |
| Aggregatibacter phage                                                       | 166                   |

**Table S5.** Viral recovery and coverage of the included positive controls.

| Family         | Genus        | Coverage | Depth | Reads | NT       | AA       |
|----------------|--------------|----------|-------|-------|----------|----------|
|                |              |          |       |       | identity | Identity |
| Coronaviridae  | SARS-CoV-2   | 68.9%    | 78.1% | 9256  | 99.9%    | 99.5%    |
| Picornaviridae | Rhinovirus A | 93.6%    | 28.5% | 1091  | 86.6%    | 89.8%    |

#### COVERAGE MAP

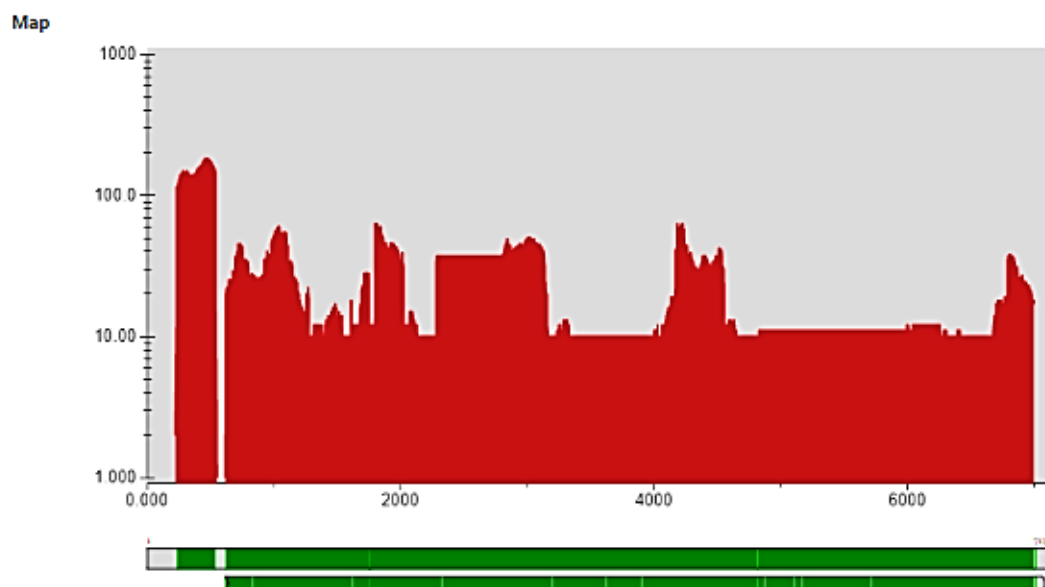

(a)

#### COVERAGE MAP

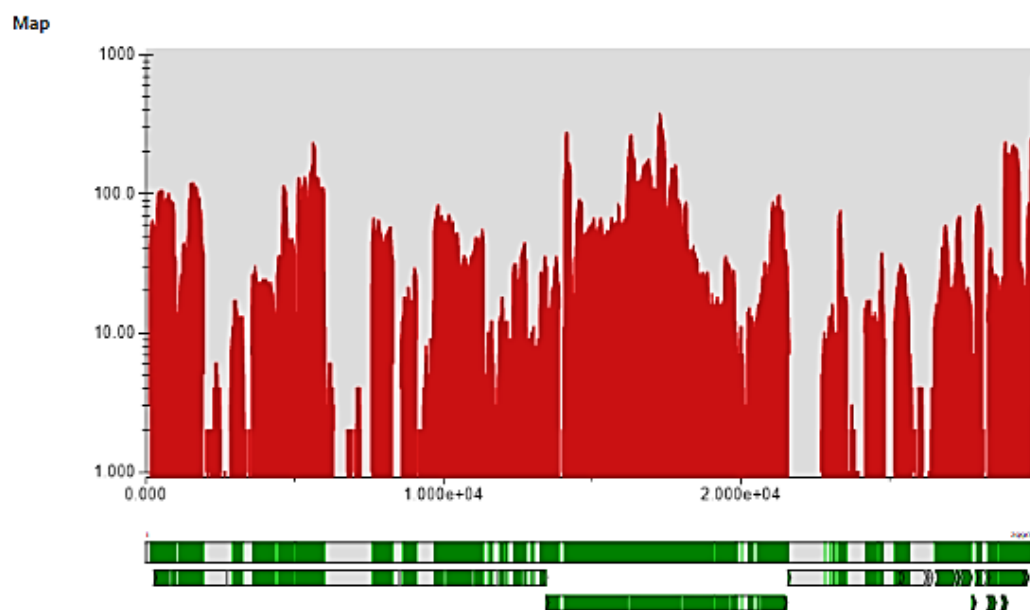

(b)

**Figure S1.** Viral genome coverage and sequencing depth as retrieved from genome detective web result. The two representative viruses are **(a)** SARS-CoV-2 **(b)** Rhinovirus A.

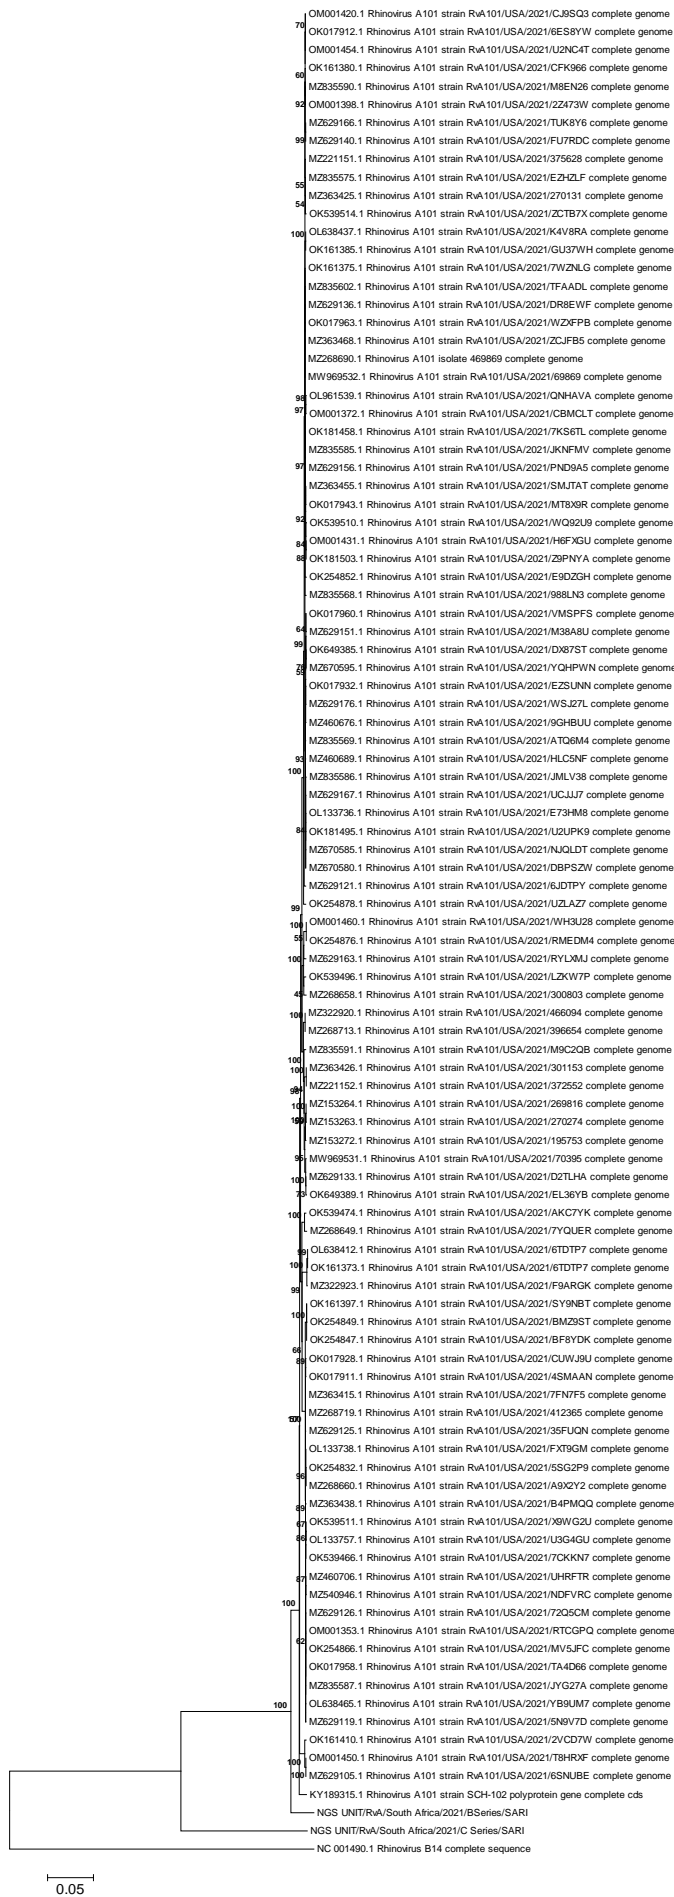

**Figure S2.** Complete 100 rhinovirus A sequences retrieved from GenBank.
